# Supplementary material
Source: PubMed Central journal article supplement (PMC3887843)
Supplement: molcell-34-3-305-10-supplementary.pdf [file molcell-34-3-305-10-supplementary.pdf]

Supporting information (Fig. S1 and Table S1)

Fig. S1

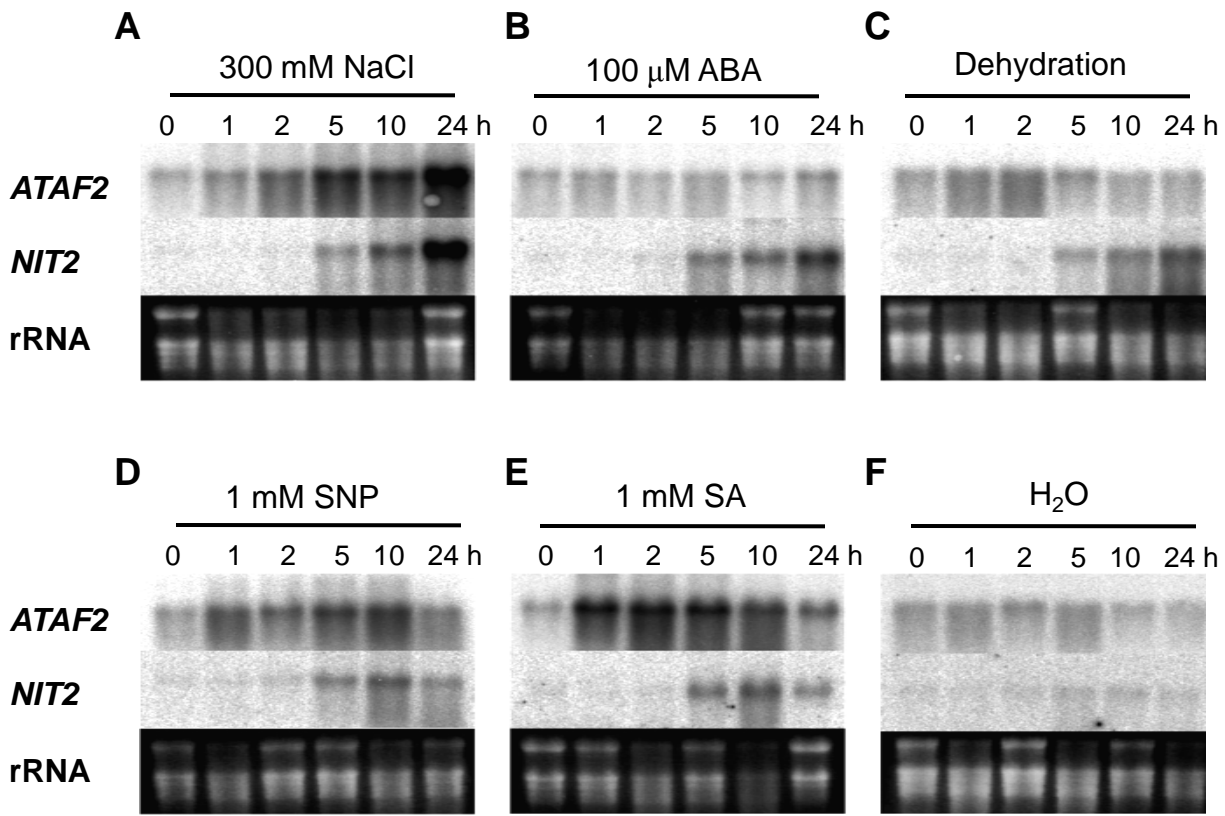

Fig. S2

A

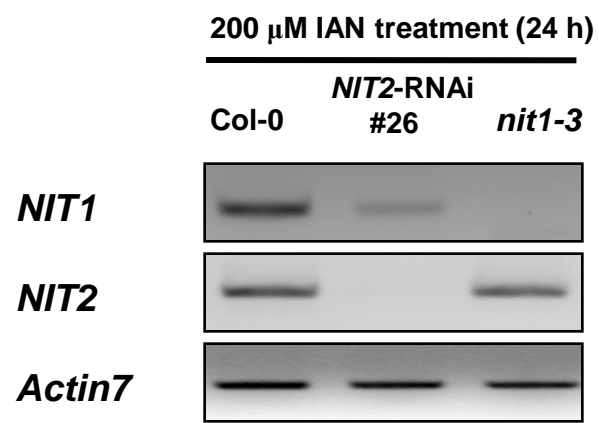

B

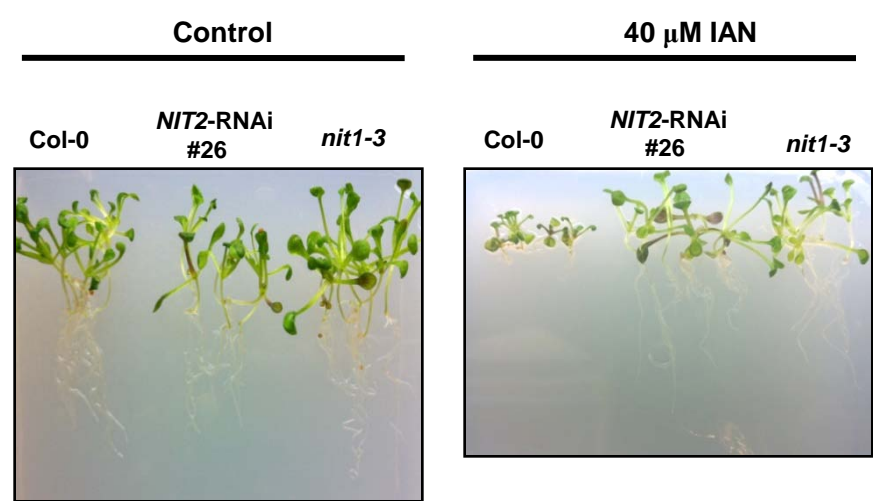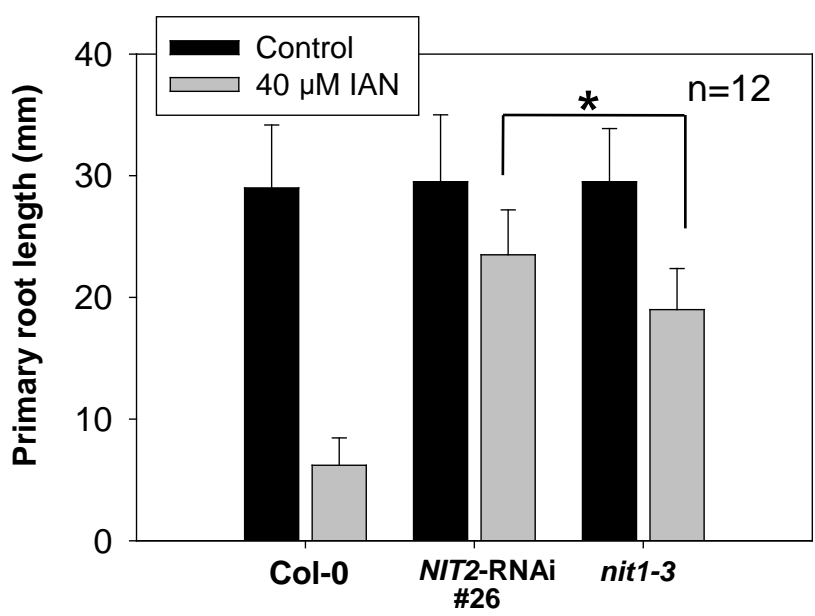

Table S1. Primers used for *NIT2* promoter deletion constructs

| Primer name | Sequences (5' to 3')                    |
|-------------|-----------------------------------------|
| NIT2F 2.4K  | CACCCCTGGCGAGGAATAAGCATGACT             |
| NIT2R 2.4K  | GGAGGCTTGGACAATGGTAGCTCGAACAATG         |
| NIT2PROR    | TGAAGTTCATGGTTTCTGTTTTAACTTGAGCT        |
| P1          | GGATCCTTCACTTTCATCAGCATAATTTTCA         |
| P2          | GGATCCGGGTCGATAGTAATATGAGATGGT          |
| P4          | GGATCCCGGGATCCAAAGATTACACCATACGAAAATAGA |
| P5          | GGATCCGCATGGAATAATGGAGTAATAATATAT       |
| P6          | GGATCCTGGGTGAATATTTTCCAAATTAAGT         |
| P7          | CCATCCAAATAAGAAGGCAAATATAATTTG          |
| P8          | GGATCCACAATATTAGAGAATCTCATAATCT         |
| P9          | GGATCCGAGAATCTCATAATCTTATCTTCTTACT      |
| P10         | GGATCCAATAGTTGTTATCAAATTATATTTG         |
| P11         | GGATCCGCTACAGTTAATTTGGAAAAATATTC        |
